Titles:

**Variation and evolution of the glutamine-rich repeat region of *Drosophila* Argonaute-2**

Authors:

**William H. Palmer**\*<sup>1,2</sup>

**Darren J. Obbard**<sup>1,2</sup>

**<sup>1</sup> Institute of Evolutionary Biology and Centre for infection, Evolution and Immunity,  
University of Edinburgh, Kings Buildings, West Mains Road, Edinburgh, UK**

**\*Author for correspondence**

## Abstract

RNA interference pathways mediate multiple biological processes through Argonaute-family proteins, which bind small RNAs as guides to silence complementary target nucleic acids. In insects and crustaceans, *Argonaute-2* silences viral nucleic acids, and therefore acts as a primary effector of innate antiviral immunity. Although the function of the major *Argonaute-2* domains, which are conserved across most Argonaute-family proteins, are known, many invertebrate *Argonaute-2* homologs contain a glutamine-rich repeat (GRR) region of unknown function at the N-terminus. Here we combine long-read amplicon sequencing of Drosophila Genetic Reference Panel (DGRP) lines with publicly available sequence data from many insect species to show that this region evolves extremely rapidly and is hypervariable within species. We identify distinct GRR haplotype groups in *D. melanogaster*, and suggest that one of these haplotype groups has recently risen to high frequency in North American populations. Finally, we use published data from genome-wide association studies of viral resistance in *D. melanogaster* to test whether GRR haplotypes are associated with survival after virus challenge. We find a marginally significant association with survival after challenge with Drosophila C Virus in the DGRP, but we were unable to replicate this finding using lines from the Drosophila Synthetic Population Resource panel.

## 1 **Introduction**

2 Argonaute proteins are the effectors of eukaryotic RNA interference (RNAi) pathways, using short  
3 nucleic acid guide sequences to target complementary sequences for transcriptional or post-  
4 transcriptional repression. RNAi-related pathways mediate a diverse range of biological processes,  
5 from regulation of developmental genes through miRNAs and endogenous siRNAs, to defence  
6 against genomic parasites such as transposable elements via piRNAs (reviewed in Carmell et al,  
7 2002; Meister, 2013). RNAi is also a key line of antiviral defence in plants (Lindbo et al, 1993;  
8 Ratcliff et al, 1997), fungi (Segers et al, 2006), ecdysozoan animals such as arthropods and  
9 nematodes (Wilkins et al, 2005; Wang et al, 2006), and possibly even in some vertebrate tissues (Li  
10 et al, 2013; Maillard et al, 2013). In insects, antiviral RNAi is mediated by an RNA Induced  
11 Silencing Complex that contains Argonaute-2 (Ago2). This complex is guided by 21nt siRNAs  
12 ‘diced’ from viral replicative intermediates and other dsRNA substrates by Dicer-2 (Okamura et al,  
13 2004; Lee et al, 2004; Wang et al, 2006) and bound to Ago2. Ago2 then uses these siRNAs to target  
14 the ‘slicing’ of viral single-stranded RNA, rendering the targeted viral genome or transcript non-  
15 functional.

16  
17 Despite the diverse biological roles played by Argonaute proteins, their structural organisation is  
18 generally conserved over deep evolutionary time (Swarts et al, 2014). For example, eukaryotic  
19 Argonaute proteins have a PIWI domain that binds and/or ‘slices’ target nucleic acids (Song et al,  
20 2004; Parker et al; 2004), MID and PAZ domains that bind the 3' and 5' ends of the small RNA,  
21 respectively (Lingel et al, 2003; Ma et al, 2004; Ma et al, 2005; Boland et al, 2010), and an N-  
22 terminal domain which is involved in duplex unwinding (Kwak and Tomari, 2012). Nevertheless, in  
23 contrast to these highly conserved domains, the N-terminal region of Argonaute proteins tends to be  
24 disordered and lack sequence complexity, and is highly variable between species (Hain et al, 2010).  
25 This variation is particularly striking in the arthropod antiviral gene, Ago2, where the N-terminal  
26 region is often composed of numerous glutamine-rich repeat motifs (‘GRR’; Hain et al, 2010). For

27 example, even between closely related species such as *Drosophila melanogaster* and *D. simulans*,  
28 the N-terminal sequence divergence is extensive. In *D. melanogaster*, Ago2 includes one of the  
29 most repetitive amino acid sequences in the genome (Jorda and Kajava, 2009), while in *D. simulans*  
30 it is markedly different, with only one large duplication of almost the entire N-terminus (Figure 1).

31

32 In *D. melanogaster*, the GRR region is composed of two distinct repeat regions (GRR1 and GRR2;  
33 Hain et al, 2010). The most N-terminal, GRR1, is a 6 amino acid imperfect repeat (QQLQQP)  
34 present in two to four copies, while GRR2 is a 23 residue imperfect repeat (Figure 2) reported to  
35 occur between seven and eleven times in succession in laboratory strains (Hain et al 2010).

36 Although many genetic studies have elucidated the function of Ago2 in *D. melanogaster*, the role of  
37 the GRR is still unknown. In other proteins long poly-glutamine tracts have been implicated in  
38 increased protein adhesion and protein complex formation, and underlie numerous human diseases  
39 (reviewed in Fan et al, 2014). However these are generally long contiguous tracts of glutamine  
40 residues, in contrast to the short complex repeat units observed in the Ago2 GRR. Further, Ago2  
41 GRR deletions appear to have no effect on RISC assembly in *Drosophila* (Liu et al, 2009),  
42 suggesting that this domain is not required for binding siRNAs or catalysing target cleavage. The  
43 absence of known function makes it difficult to predict which evolutionary forces underlie the  
44 observed rapid evolution of the GRR.

45

46 Consistent with the antiviral role of *Drosophila* Ago2, the other domains of this protein display  
47 strong evidence of positive selection, exhibiting locally reduced diversity around the gene through  
48 selective sweeps, and elevated rates of amino acid substitution (Obbard et al, 2006; Obbard et al,  
49 2011; Kolaczowski et al, 2011). We have previously argued that this rapid adaptive evolution may  
50 be driven by virus-mediated selection, through the action of viral suppressors of RNAi (Obbard et  
51 al, 2009b), such as those seen in *Drosophila* C Virus and *Drosophila* Nora Virus (van Rij et al,  
52 2006; van Mierlo et al, 2014). The reportedly high level of variation within the *D. melanogaster*

53 GRR region is therefore surprising, as one might expect diversity to be continually removed by  
54 nearby selective sweeps. One possible explanation is that the high diversity and differentiation seen  
55 in the GRR is associated with a low constraint on this sequence, combined with high rates of  
56 recombination and replication slippage mediated mutations (e.g. Jeffreys et al, 1988). Alternatively,  
57 if the GRR domains are involved in the antiviral function of Ago2, or interact with VSRs, the high  
58 diversity seen in Ago2 GRRs could reflect the action of diversifying selection—which is a common  
59 outcome of many models of host-parasite coevolution. (e.g. Antonovics and Thrall, 1994; Sasaki,  
60 2000)

61

62 Whether or not the high divergence and diversity seen in GRR2 is an evolutionary consequence of  
63 virus-mediated selection, a virus-related role for GRR2 might be reflected by segregating functional  
64 variation associated with GRR2 haplotype. In principle, this could be identified by a genome-wide  
65 association study (GWAS) such as that which identified *pastrel* (Magwire et al, 2012). However, as  
66 repeat variants are challenging to reconstruct or identify using short sequencing reads (Treangen  
67 and Salzberg, 2012), GWAS analyses have largely been limited to SNP and simple structural  
68 variation. Thus previous GWAS analyses of viral resistance in *Drosophila* (Magwire et al, 2011;  
69 Magwire et al, 2012) have been unable to test for phenotypes associated with highly repetitive  
70 sequences, and instead could only have detected its impact through linkage with neighbouring  
71 SNPs. But, because SNP diversity is low in *Ago2*-surrounding region, the scale of linkage  
72 disequilibrium (LD) is short in *Drosophila*, and LD between a SNP and neighbouring hypermutable  
73 loci break down rapidly (Sawaya et al, 2015), a role for GRR variation in determining viral  
74 resistance remains untested.

75

76 Here we characterise the sequence diversity of the Ago2 GRR region in insects, and use Pacific -  
77 Biosciences SMRT long-read sequencing of RT-PCR amplicons to generate full GRR haplotypes  
78 for 127 lines of the *Drosophila* Genetic Reference Panel (DGRP; Mackay et al, 2012). We use these

79 data to re-examine the evolution of this domain and its potential role in antiviral defence. In doing  
80 so we not only demonstrate the value of long-read technology for performing genome-wide  
81 association studies (GWAS) when complex repetitive loci are present, but also illustrate the  
82 potential challenges associated with such analysis using short-read technology alone. We provide  
83 the first robust *Ago2* GRR haplotypes for natural populations, and identify likely haplotypes in  
84 publicly available short read data, and quantify differences in the frequency and composition of  
85 GRR haplotypes between African and North American populations. Using published GWAS data  
86 (Magwire et al, 2012) to test for an association between GRR haplotype and virus survival  
87 phenotypes, we detect a small but nominally significant association of GRR haplotype with  
88 longevity of DCV-infected flies. However, we were unable to confirm this association with a  
89 second independent experiment using recombinant inbred lines.  
90

## 91 **Methods**

### 92 **Comparison of the GRR across insects**

93 We obtained the GRR repeat unit for other insect species by using tBLASTx with default  
94 parameters to query all arthropod RefSeq RNA sequences using the *Ago2* region just C-terminal to  
95 the GRR from *D. melanogaster*. We manually selected repetitive sequences as input for Tandem  
96 Repeat Finder (v4.07b, Benson, 1999) with a mismatch and indel penalty of 5 and minimum  
97 alignment score of 50. The insect reference tree was inferred using MrBayes (v2.13, Huelsenbeck  
98 and Ronquist, 2001) with an HKY85 substitution model and gamma-distributed rate variation with  
99 invariable sites, using conserved sequences from the original tBLASTx search aligned in MUSCLE  
100 (v3.8.31, Edgar, 2004) as input. The high divergence between GRR sequences, including extensive  
101 indel variation, makes it extremely challenging to infer positional homology (i.e. alignment) in the  
102 GRR regions. We therefore used the frequency feature profile phylogeny building tool (v.3.19,  
103 Sims et al, 2009) to quantify similarity between the GRR of insects, as this approach can be used in  
104 the absence of alignment. Frequency feature profiles break the nucleotide or amino acid sequence  
105 into a distribution of kmers and compares these distributions against each other taking into account  
106 similarity between amino acid residues. The frequency feature profiles were constructed in two  
107 ways: in the first, GRR repeat unit consensus sequences were used as input to cluster GRRs, and in  
108 the second the entire GRR region was used. In each case, the topology of these clusters were  
109 compared to the MrBayes tree, using a kmer size which maximised similarity of the feature  
110 frequency profile tree to the MrBayes tree, as it is expected that the GRR shares the same history as  
111 the rest of *Ago2*.

112

113

## 114 **Sample preparation**

115 We sequenced the GRR region from a subset of the *Drosophila* Genetic Reference Panel (DGRP)  
116 and 7 other closely related *Drosophila* species. The DGRP constitute a collection of highly inbred  
117 lines from *D. melanogaster* collected in Raleigh, NC in 2003 (Mackay et al, 2012) that have  
118 previously been sequenced using the Illumina platform to provide a public resource for GWAS.  
119 However, as short-read sequencing cannot easily be used to reconstruct repetitive sequences, such  
120 as the GRR region of *Ago2*, we generated new amplicon data for the *Ago2* GRR region from 127 of  
121 these lines. To avoid sequencing the long intron between GRR1 and GRR2, (RT-)PCR was  
122 performed on RNA extracted from 10 flies per line to obtain an amplicon containing the full *Ago2*  
123 GRR1 and GRR2 regions. For species other than *D. melanogaster*, sample origins are as described  
124 in Longdon et al (2011). For all species, RNA was extracted using Trizol (Ambion) according to  
125 the manufacturer's instructions. Three forward primers were designed separately for the *Drosophila*  
126 *melanogaster/simulans/mauritiana* clade, the *Drosophila yakuba/erecta/santomea* clade, and for *D.*  
127 *ananassae* based on published genome sequences (PCR primer sequences: 15F *D. yakuba*:  
128 ATGGGAAAGAAGAACAATTCAAGG; 30F *D. melanogaster*:  
129 GAACAAGAAAGGAGGACAGG; 18F *D. ananassae*: ATATAAGGATGACGGGAAGC). PCRs  
130 shared a single reverse primer designed to amplify all species (1550R  
131 CAGCTTATCCACCGAGTAGCA) except for *D. ananassae* (GTCGACATTAAGAAACGGTT).  
132 Paired barcode sequences from the Pacific Biosciences SMRT Portal v1.4 were added to the 5' end  
133 of each primer, along with the padding sequence GG TAG. Barcoded amplicons were then  
134 combined into 10 pools of 16 samples and gel purified for sequencing.

135

## 136 **Long read amplicon sequencing and analyses**

137 Samples were pooled in groups of 16 and subject to Pacific Biosciences SMRT-cell  
138 sequencing (NERC Biomolecular Analysis Facility, Liverpool). *D. melanogaster* raw reads were



139 demultiplexed and filtered in the SMRT portal by 5 minimum passes around the circular template,  
140 with a minimum predicted accuracy of 70%, a minimum insert size of 1000 bases, and a minimum  
141 barcode score of 22. From these, 5-pass circular consensus sequences (5CCS) were called for each  
142 read (raw read processing was performed by NERC Biomolecular Analysis Facility, Liverpool).  
143 Although these 5CCS reads may still contain errors, to obtain the final consensus sequence for each  
144 sample we grouped all 5CCS reads by length, and then removed reads whose length was observed  
145 in less than 10 reads. This filtering resulted in a single peak of read lengths for each amplicon (e.g.  
146 Figure S1) in all but one fly line. In this one case (DGRP-306), we detected two high-frequency  
147 haplotypes, suggesting that this line is heterozygous at the GRR region, and this sample was  
148 excluded from all subsequent analyses. Consensus sequences from 5CCS reads within the length  
149 class resulted in high-confidence haplotypes from 127 of the DGRP lines, which were used in  
150 further analyses. In addition, eight haplotypes from a Kenyan (Nairobi) population, which were  
151 previously obtained by Sanger sequencing of long PCR products (Obbard et al 2006), were also  
152 included in the analysis. GRR sequences were also obtained from single lines of *D. simulans*, *D.*  
153 *sechellia*, *D. mauritiana*, *D. yakuba*, *D. santomea*, *D. erecta*, and *D. ananassae*. These were  
154 analysed in the SMRTportal with the parameters described above, but with a minimum insert size of  
155 500 bp. We used BLAST (2.2.31+, Camacho et al, 2008) to assign each long 5CCS read to species  
156 based on coding sequence to the 3' of GRR2, then we grouped reads by species and read length.  
157 Peaks in read length were again assumed to be indicative of a distinct amplicon, and analyses were  
158 performed as in the *D. melanogaster* samples. To cluster haplotypes (Figure 2) by repeat unit, the  
159 distinct repeat units observed in *D. melanogaster* were each labelled with an identifying letter, such  
160 that a haplotype can be denoted a string of repeat-unit identifier letters. We then used text-based  
161 feature frequency profiles (hash length of 2) to cluster and visualise haplotypes by repeat unit  
162 similarity (Sims et al, 2009).

163

164

## 165 **Characterisation of GRR repeats in published short-read data**

166 To explore the utility of published short-read sequencing in the reconstruction of the *Ago2*  
167 GRR, we obtained short read sequences of DGRP (Accession number: PRJNA36679, Mackay et al,  
168 2012) and *Drosophila* ‘Nexus’ lines (Lack et al, 2015: Table S1 Accession numbers). To retain  
169 reads deriving from the region of interest, all reads were mapped to the full set of 127 sequenced  
170 GRR haplotypes using Bowtie2 (v. 2.2.4, Langmead and Salzberg, 2012) with default parameters,  
171 retaining all read pairs for which at least one mate mapped. An attempt was made to assemble these  
172 reads de novo using Velvet (v1.2.10, Zerbino and Erbino, 2008), using the hash length for each  
173 individual that maximised contig length, and using the expected coverage and insert length data  
174 from the short read archive.

175 To assess whether the distribution of repeat units in short read sequences could be used to infer  
176 GRR2 haplotypes, we used Jellyfish (v.2.2.3, Marcais and Kingsford, 2011) with a kmer size of 69  
177 (the size of a GRR repeat in *D. melanogaster*) and a lower coverage bound of 2 (although this  
178 parameter had no qualitative effects when varied from 0 to 10) to infer counts for known repeat  
179 units in each sample. To ensure we only included samples with sufficient coverage of the GRR to  
180 reliably infer haplotypes, we filtered out those without reads supporting repeat units GRR2-G and  
181 repeat unit GRR2-A, and without ten reads supporting GRR2-E (all of which occurred in all  
182 samples, with GRR2-E being most common). The retained samples were then normalised by total  
183 read count to obtain a proxy for relative abundance of repeat units in each sample.

184

## 185 **Linkage Disequilibrium analysis**

186 We combined our GRR haplotype data with known SNPs and indels within 5 KB on either side of  
187 *Ago2* from the DGRP dataset (<http://dgrp2.gnets.ncsu.edu/data/website/dgrp2.tgeno>), replacing any  
188 reported sequence within the GRR with our own long-read sequence data. We then calculated a  
189 multiallelic extension of  $r^2$  (Hill and Robertson, 1968), which provides an accurate metric of linkage  
190 disequilibrium (LD) among multiallelic loci (Zhou et al, 2007). The analysis was performed using

191 our data coded as entire haplotypes (and therefore highly multiallelic), and also as a series of SNPs  
192 and indels from alignment of the haplotypes.

193 The rapid increase in frequency of a beneficial allele is expected to lead to extended regions  
194 of high LD around the swept allele (termed ‘haplotype homozygosity’); Sabeti et al, 2002) and to  
195 quantify this, we used the program nSL (v.0.47 Ferrer-Admetlla et al, 2014), was used to calculate  
196 the nSL statistic. This is similar to the more widely-used iHS statistic (Voight et al, 2006), except  
197 that distance is measured as the number of segregating sites rather than map distance, making it  
198 more robust to recombination rate variation. Moving along the sequence, at each polymorphic site  
199 nSL calculates the average number of consecutive polymorphisms associated with either the  
200 ancestral or derived allele in question. Either exceptionally large or small values of the nSL statistic  
201 are evidence that a variant has rapidly increased in frequency. For *D. melanogaster* we polarised the  
202 sites with the *D. simulans* genome by parsimony, aligned by LastZ (v.1.02.00), and standardised the  
203 nSL statistic by allele frequency.

204

### 205 **Association with viral phenotypes and infections**

206 To test whether variation in the GRR haplotype is associated with variation in viral resistance, we  
207 used data from previous GWAS studies (Magwire et al, 2011; Magwire et al, 2012) of the DGRP  
208 lines for resistance against three different viruses. These were *Drosophila C Virus* (DCV, a  
209 horizontally transmitted and highly pathogenic Dicistrovirus naturally infecting *D. melanogaster*;  
210 Brun and Plus, 1980; Webster et al, 2015); *D. melanogaster Sigma Virus* (DMelSV: a vertically  
211 transmitted Rhabdovirus naturally infecting *Dmel*; Brun and Plus, 1980; Longdon et al, 2012;  
212 Webster et al, 2015), and *Flock House Virus* (FHV, a horizontally transmitted Alphanodavirus  
213 naturally infecting beetles, closely related to Newington virus of *D. immigrans* (Webster et al,  
214 2016). We fitted general linear mixed models using the R package MCMCglmm (v2.22, Hadfield,  
215 2010) with DGRP line and replicate block (block equivalent to date for FHV and DCV) as random  
216 effects, and known segregating functional variants (*pastrel* for DCV, and *ref(2)p*, *CHKov*, and *gel*

217 for DMelSV) and GRR haplotypes as fixed effects.

218 The final model was:

$$219 \mathbf{Y}_{ijkl} \sim \boldsymbol{\mu} + \mathbf{pastrel}_i + \mathbf{haplotype}_j + \mathbf{line}_k + \mathbf{block}_l + \boldsymbol{\varepsilon}$$

220 Where  $\mu$  is the mean survival time and  $\varepsilon$  is a normally-distributed error term. If linkage  
221 disequilibrium is sufficiently large, it may be difficult to separate the effect of GRR haplotype from  
222 the effect of (partially) linked SNPs. Therefore, to examine whether the GRR haplotype is acting as  
223 a marker for a neighbouring causal SNP, we also fitted models in which each flanking SNP was  
224 tested for an association with mortality, and then selected those which were nominally significant  
225 (with no correction for multiple testing) for inclusion in the model outlined above to verify any  
226 observed effect was due to the GRR.

227

### 228 **Recombinant inbred line infections**

229 To further test for an association between *Ago2* GRR haplotype and viral resistance, we  
230 experimentally infected recombinant inbred lines from the *Drosophila* Synthetic Population  
231 Resource (King et al, 2012) with DCV. We categorised lines by *Ago2* GRR haplotype groups based  
232 on presence of short reads containing the repeat units GRR2-L (as a marker for haplotype group 1)  
233 or GRR2-D and GRR2-K (as markers for haplotype group 2). The length of the linked region  
234 around the GRR region was calculated in each recombinant inbred line, and 100 lines from each  
235 haplotype group were selected with the aim of minimising the impact of linked variants (i.e. lines  
236 were chosen on the basis of nearby break points). Infections were performed by injecting  
237 *Drosophila C Virus* abdominally into 10 flies (per vial, an average of 3 vials per line) at  $10^5$   
238 TCID<sub>50</sub>, chosen on the basis that this dosage caused mortality in approximately one week. Flies  
239 were kept at 25 degrees in agar vials and monitored for 7 days post-infection (DPI) with mortality  
240 recorded on each day. The data were analysed using a binomial regression in MCMCglmm with the  
241 model:

$$242 \mathbf{Y}_{ijklm} \sim \boldsymbol{\mu} + \mathbf{DPI} + \mathbf{DPI}^2 + \mathbf{pastrel}_i + \mathbf{GRRhaplotype}_j + \mathbf{line}_k + \mathbf{Vial}_l + \mathbf{Date}_m + \mathbf{Date:DPI} +$$

243 **Vial:DPI +  $\epsilon$**

244 We followed Longdon et al (2011) in coding mortality (Y) as a number of ‘successes’ (the number  
245 of flies remaining alive in a vial on a certain day) and ‘failures’ (the number of flies that died on a  
246 certain day), as in. This model fits GRR genotype, *pastrel* parent of origin (as a proxy for *pastrel*  
247 genotype), and DPI as fixed effects. DPI is encoded as both a linear and quadratic predictor, as  
248 mortality tends to decrease after the peak infection. We included DSPR line (genetic background),  
249 vial, and date as random effects, allowing for interactions between the DPI and either date or vial  
250 effects.

251

252 **Results**

253 **Evolution of the GRR across insects**

254 The presence of a GRR region in *Ago2* is conserved across the arthropods, but the GRR evolves  
255 extremely rapidly, and the diverse structure of the GRR makes alignment and assembly of these  
256 regions challenging. Some species have multiple repeat units, such as *Megachile rotundata*  
257 (leafcutter bee)—with repeat units QRRSLAPHG and LKQQQQPLAPQQHHTFA— others have  
258 nested repeat units, as in *Tribolium castaneum* (flour beetle), where a region with multiple repeats  
259 with consensus QQQWQQQPQPHP appears to have been duplicated. To circumvent these  
260 difficulties, feature frequency profiles (see Materials and Methods) of the GRR and amino acid  
261 composition were used to quantify similarity. Conservation of either amino acid composition or  
262 repeat unit sequence could imply functional significance of the GRR, and so we examined the GRR  
263 of 34 insect species (Figure 1). Feature frequency profiles were constructed from the entire GRR  
264 (Figure 1B) or from the consensus repeat unit (Figure S2), and compared to the *Ago2* gene tree  
265 (Figure 1A, Figure S3). In both cases, the GRR region sequences clustered broadly according to  
266 known species relationships but do not reliably reflect more divergent evolutionary relationships.  
267 For example, the relationships between *D. melanogaster*, *D. simulans*, *D. erecta*, and *D. yakuba*  
268 were correctly resolved, but the Drosophilidae did not cluster together in any distance measure. This

269 divergence is in part due to structural differences between GRRs (Figure 1C), as the number and  
270 size of repeat units is variable, even between closely related species. Alternatively, amino acid  
271 sequence composition is similar across the species analysed, with glutamine the most frequent  
272 amino acid residue in all species analysed except *Athalia rosae* (turnip sawfly; Figure 1). This  
273 conservation is further illustrated throughout the Drosophilidae (and closest outgroup *M.*  
274 *domestica*), whose GRR is strikingly glycine-rich. These observations argue that although the GRR  
275 sequence and structure evolves quickly, the composition may be under selective constraint,  
276 implying functionality.

277

### 278 **Haplotypes and repeat units in *D. melanogaster* Ago2 GRR**

279 We found extensive repeat polymorphism among the DGRP lines. Among the 127 lines sequenced,  
280 we identified three different GRR1 haplotypes and eighteen GRR2 haplotypes. All GRR1  
281 haplotypes comprise one to three perfect repeats of the sequence PQLLQQ, with two repeats being  
282 most common (Figure 2). The GRR2 is more complex, with 12 different repeat units (labelled  
283 GRR2-A to GRR2-L, Figure 2). The distinct repeat units are all within 3 nucleotide differences of  
284 each other and a consensus sequence of GQQQGGHQGRQGEQGGYQQRPP (Figure 2), and  
285 occur 10-15 times in tandem. Most of the GRR2 sequence is composed of two repeat units: GRR2-  
286 E (occurring 4-8 times per haplotype) and GRR2-G (occurring 1-6 times per haplotype), which  
287 differ at a single amino acid position. In contrast, the majority of repeat units are rare— only  
288 occurring in one haplotype, and are most likely the result of recent single base pair mutations (e.g.  
289 GRR2-J). Together, the GRR1 and GRR2 alleles form 23 distinct GRR haplotypes in our dataset,  
290 which we infer differ from one another by one or two mutation or recombination events (single base  
291 changes, whole-repeat insertions and/or deletions, and gene conversion). Clustering GRR  
292 haplotypes by repeat unit composition (see materials and methods) identifies two largely distinct  
293 haplotypes classes (coloured gold and red in Figure 2), and one putatively recombinant haplotype  
294 (*GRR Hap11* – coloured orange) in the DGRP sample. Based on this clustering dendrogram, we

295 have attempted to reconstruct the recent history of the GRR region (Figure 3).

296 Many of these GRR haplotypes occur at a low frequency in this population, with 11 of the  
297 23 haplotypes occurring only once in our sample (Figure 2, Figure 3). There are three high  
298 frequency haplotypes (*Haps1 – 3*) with the latter two differing by only one repeat unit.  
299 Interestingly, there are many differences between the *Hap1* and *Hap2/Hap3* groups, such that no  
300 simple single mutational event could convert one to the other. Further, the haplotypes more closely  
301 related to *Hap1* occur at low frequencies and are no more than two mutational events from *Hap1*  
302 itself, suggesting they may have been formed recently. This observation is at odds with the high  
303 frequency of *Hap1*, and may indicate a recent increase in the frequency of the *Hap1* group. In  
304 further support of this idea, despite the approximately equal frequency of the *Hap1* and *Hap2/3*  
305 classes in the population, nucleotide diversity in *Ago2* and a 100 kb surrounding region is much  
306 lower in haplotypes from the *GRR Hap1* clade than those in *GRR Hap2/3*, indicating this *GRR*  
307 *Hap1* is younger than expected given its frequency (Figure S4). Nevertheless, there does not seem  
308 to be any evidence for significant extended haplotype homozygosity in the remainder of the gene  
309 (Figure S5).

310 We also analysed 8 Sanger-sequenced GRR2 haplotypes from a Kenyan population of *D.*  
311 *melanogaster* (Obbard et al, 2006) and compared them to the DGRP haplotypes (Figure 2).  
312 Notably, 7 of the 8 Kenyan haplotypes were distinct from each other, and in these 7 haplotypes,  
313 four new repeat units were found (GRR2-M, GRR2-N, GRR2-O, GRR2-P; Figure 2). This may  
314 suggest that the diversity in the DGRP is a subset of African diversity, as expected from the  
315 evolutionary history of this species (Lachaise and Silvain, 2004; reviewed in Stephan and Li, 2007).  
316 GRR2-L, the defining repeat unit of the GRR *Hap1* clade found in the DGRP (gold branches in  
317 Figure 2) was rare in this sample of 8 Kenyan sequences, although not absent, suggesting the  
318 presence of substantial population structure in GRR.

319 Although we were unable to reconstruct reliable GRR haplotypes from short-read data, we  
320 were able to identify the presence of specific repeat units such as *GRR-L*, which is diagnostic of the

321 *GRR Hap1* clade, and *GRR-D* and *K*, which are diagnostic of *GRR Hap2/3* clade. We therefore took  
322 advantage of the recent release of the *Drosophila* Genome Nexus, which includes the DGRP as well  
323 as individuals sequenced from Africa and France, (Lack et al, 2015) and characterised the  
324 distribution of repeat units in these lines (Figure 4). There are repeat units specific to both African  
325 (*GRR2-O* and *GRR2-N*) and North American (*GRR2-B*, *GRR2-H*, *GRR2-I*, and *GRR2-J*)  
326 populations, although those peculiar to North America were all rare variants. French lines also  
327 cluster together, characterised by co-occurrence of *GRR2-L* and *GRR2-K* – the defining features of  
328 each of the two large classes defined by the DGRP, indicating these lines may be recombinants or  
329 heterozygotes. Short read data also suggested that *GRR2-L* is rare in Africa, whereas *GRR-D/K* are  
330 common and often co-occur. These observations indicate that the *GRR Hap1* clade has risen in  
331 frequency since *D. melanogaster* arrived in N. America.

332

### 333 **Associations between GRR haplotypes and survival during virus infection**

334 The role of the GRR region is unknown, but as Ago2 is a major effector of antiviral immunity in  
335 *Drosophila* (van Rij et al, 2006), it could function during antiviral defence. Using previously  
336 published survival data, we found no significant association between GRR haplotype and resistance  
337 to Flock House Virus (95% CI for GRR effect: -0.12 – 0.4,  $MCMCp = 0.30$ ) or Sigma Virus (95%  
338 CI for GRR effect: -0.15 – 0.03,  $MCMCp = 0.242$ ) infection in the DGRP. However, when fitting  
339 GRR haplotype as a fixed effect, we found that *Hap3* alleles increased longevity following  
340 challenge with *Drosophila C Virus* (DCV).by approximately 0.7 days relative to *Hap1* alleles  
341 ( $MCMCp = 0.012$ , [95% CI 0.21 – 1.17] days; Figure S6). This appears to be due to the GRR2  
342 region, as inclusion or exclusion of GRR1 state had no effect. A second model in which GRR1 data  
343 were excluded, identified both *Hap2* and *Hap3* as significantly increasing survival relative to *Hap1*  
344 (*Hap2*:  $MCMCp = 0.006$ , 0.56 [ 0.15 – 0.97] days); *Hap3*:  $MCMCp = 0.006$ , 0.64 [0.23-1.07]  
345 days). However, the observed effect is small relative to the effect of the known resistance variant  
346 *pastrel<sup>T</sup>* (Magwire et al, 2012), which increases longevity in the same experiment by 2.07 days



347 (MCMCp <0.001, [1.58 – 2.54]).

348 Given the small size of the effect, multiple tests across viruses, and marginal p-values, we elected to  
349 perform a second independent test using a subset of the recombinant inbred lines provided by the  
350 *Drosophila* Synthetic Population Resource (DSPR; King et al, 2012). In this experiment, although  
351 mean survival time was again greater for Hap2 than Hap1, this trend was not significant (pMCMC  
352 = 0.646; Figure S6). This is unlikely to be due to low power, as we were able to detect a significant  
353 association with genotype at the known resistance locus *pastrel* (pMCMC < 0.001). We are therefore  
354 unable to replicate the nominally significant effect of GRR haplotype on survival in the DGRP.

355

## 356 **Discussion**

### 357 **GRR Amino acid composition is conserved, but repeat unit sequence and structure is not**

358 We observe a high degree of sequence divergence in the Ago2 GRR across insect species. Even  
359 over very short timescales, there is high divergence in copy number and repeat unit sequence  
360 (Figure 1). This could be explained by a high rate of partial inter-repeat replication slippage,  
361 causing the creation of new repeat units from the existing ones, and making the sequence  
362 unrecognisable in a relatively short period of time (e.g. *Dmel* and *Dsim* GRR2 sequences, which are  
363 unalignable despite only 2.5 My since they shared a common ancestor) In contrast to the sequence  
364 of the GRR, we find that the amino acid composition is conserved across the insect species  
365 analysed. Based on these observations, we envision a scenario where negative selection acts at the  
366 level of amino acids (e.g. to maintain a certain charge or hydrophobicity) but either lack of  
367 constraint or positive selection acts at the level of repeat unit sequence and structure.

368

### 369 **GRR repeats are highly variable within *D. melanogaster*, and may be under selection**

370 Repeat number polymorphism in the Ago2 GRR of laboratory lines was previously reported by  
371 Hain et al (2010), and our long-read sequencing of a natural population of *D. melanogaster* (the  
372 DGRP; Mackay et al, 2012) confirms that this variation is also widespread in the wild. However,

373 our sequencing demonstrates considerable length convergence among haplotypes, such that only 7  
374 different haplotype lengths were present among the 23 distinct haplotypes, and 8 of the 23 distinct  
375 haplotypes had the same length (1.035 kbp; Figure 2)—including haplotypes in both the *Hap1* and  
376 *Hap2* GRR groups. We found that the haplotypes falling into the *Hap1* clade appear to have  
377 recently increased in frequency in the North American (DGRP) population. This is supported by a  
378 lower diversity surrounding *GRR Hap1* than *GRR Hap2* clade haplotypes, despite the expectation  
379 that neutral diversity in linked regions should scale positively with the frequency of the allele. The  
380 increase in frequency of the *GRR Hap1* clade could be due to drift (e.g. during a bottleneck) or  
381 selection, such as parasite-mediated selection acting on *Ago2* GRR repeat region itself. However,  
382 given the known selective history of *Ago2* (Obbard et al, 2011), this distribution of haplotype  
383 frequencies could also be explained by incomplete linkage to a nearby hard sweep carrying *GRR*  
384 *Hap1* to a high frequency (e.g. Schrider et al, 2015) .

385

### 386 ***Ago2* GRR variation is not strongly associated with survival after viral challenge**

387 In other genes, extended low-complexity tracks of a single amino acids have known functions,  
388 including been implicated in transcription factor binding (e.g. glutamine, proline, alanine), protein  
389 aggregation (glutamine), and cellular localization (histidine), and recently the Q-rich opa repeats of  
390 *Notch* have been found to be involved in developmental defects (Gerber et al, 1994; Salichs et al,  
391 2009; Gemayel et al, 2015; Rice et al, 2015). But, although the long-term conservation of the *Ago2*  
392 GRR among pancrustacea argues that it is maintained by selection, the function of this repeat region  
393 remains unclear. As viral suppressors of RNAi (VSRs) have been proposed as the likely drivers of  
394 the rapid protein evolution of *Ago2* (Obbard et al, 2009), and high diversity is predicted by many  
395 models of host-parasite coevolution (e.g. Antonovics and Thrall, 1994; Sasaki, 2000) it is tempting  
396 to speculate that the *Ago2* GRR may play a role in VSR evasion. For example, the GRR could act  
397 to cover residues that underlie *Ago2*-VSR interactions, or as a bait region, sequestering VSRs away  
398 from the catalytic residues of *Ago2*. However, although *Ago2* GRR showed a significant association

399 with survival after *DCV* infection in our re-analysis of published data from 127 of the DGRP lines,  
400 we were unable to replicate this using carefully selected lines from the DSPR. These conflicting  
401 results may reflect a false positive from the DGRP analysis, or low power in the DSPR analysis,  
402 perhaps due to the challenge inherent in categorising GRR haplotypes using short read data. In  
403 either case, it is clear any association must be weak relative to previously identified segregating  
404 functional polymorphisms, such as *pastrel*.

405

#### 406 **The potential importance of complex repeat sequences in GWAS studies**

407 We find that LD within the GRR, and between the GRR and surrounding variants, is low  
408 (Figure S7), indicating that any phenotypic association with this repeat region would be difficult to  
409 identify through GWAS using linked sites only. Additionally, the convergence in length between  
410 highly divergent GRR haplotypes means that simple length assays may not be suitable to  
411 differentiate between haplotypes and may miss important variants. More generally, our study  
412 suggests that short read sequencing, such as that currently employed by the majority of association  
413 studies, is not a viable option for repetitive regions as we were only able to assemble one correct  
414 *Ago2* GRR haplotype among the 117 DGRP datasets using public sequence read data. Clustering by  
415 repeat unit presence in short read data confirm our PacBio-sequenced haplotypes (Figure 4), but  
416 may only be useful if there is prior knowledge to the possible repeat units in a population and if the  
417 region is sequenced in high depth. For example, reads with repeat units *GRR2-A*, *GRR2-G* and  
418 *GRR2-E* (which occur in every haplotype) were not always detectable in the short read data for a  
419 sample. This indicates that GRR coverage can be low, that incorrect haplotype inference was not  
420 only due to assembly errors, and may indicate that the GRR region has unusually low coverage –  
421 perhaps because it is not conducive to short read sequencing. Together, these attributes argue that  
422 sequencing repetitive regions can provide a depth of understanding not attainable by looking at  
423 length variation alone.

424

## **Acknowledgements**

We thank Stuart Macdonald for sharing of the DSPR recombinant inbred lines, Jarrod Hadfield for helping with statistical analyses, and Francis Jiggins and Daniel Fabian for making the DGRP virus survival data available to us. PacBio data generation and analysis were carried out by the Centre for Genomic Research which is based at University of Liverpool. This work was funded by a Natural Environmental Research Council Biomolecular Analysis Facility small grant (NBAF 895) to DJO. WHP is funded by the Darwin Trust of Edinburgh, and work in DJO's lab is supported by a Wellcome Trust strategic award to the Centre for Immunity, Infection and Evolution (WT095831; <http://www.wellcome.ac.uk/>)

## **Data Availability**

Haplotype sequences have been submitted to GenBank under the accession numbers KX069093 - KX069218.

## Figures

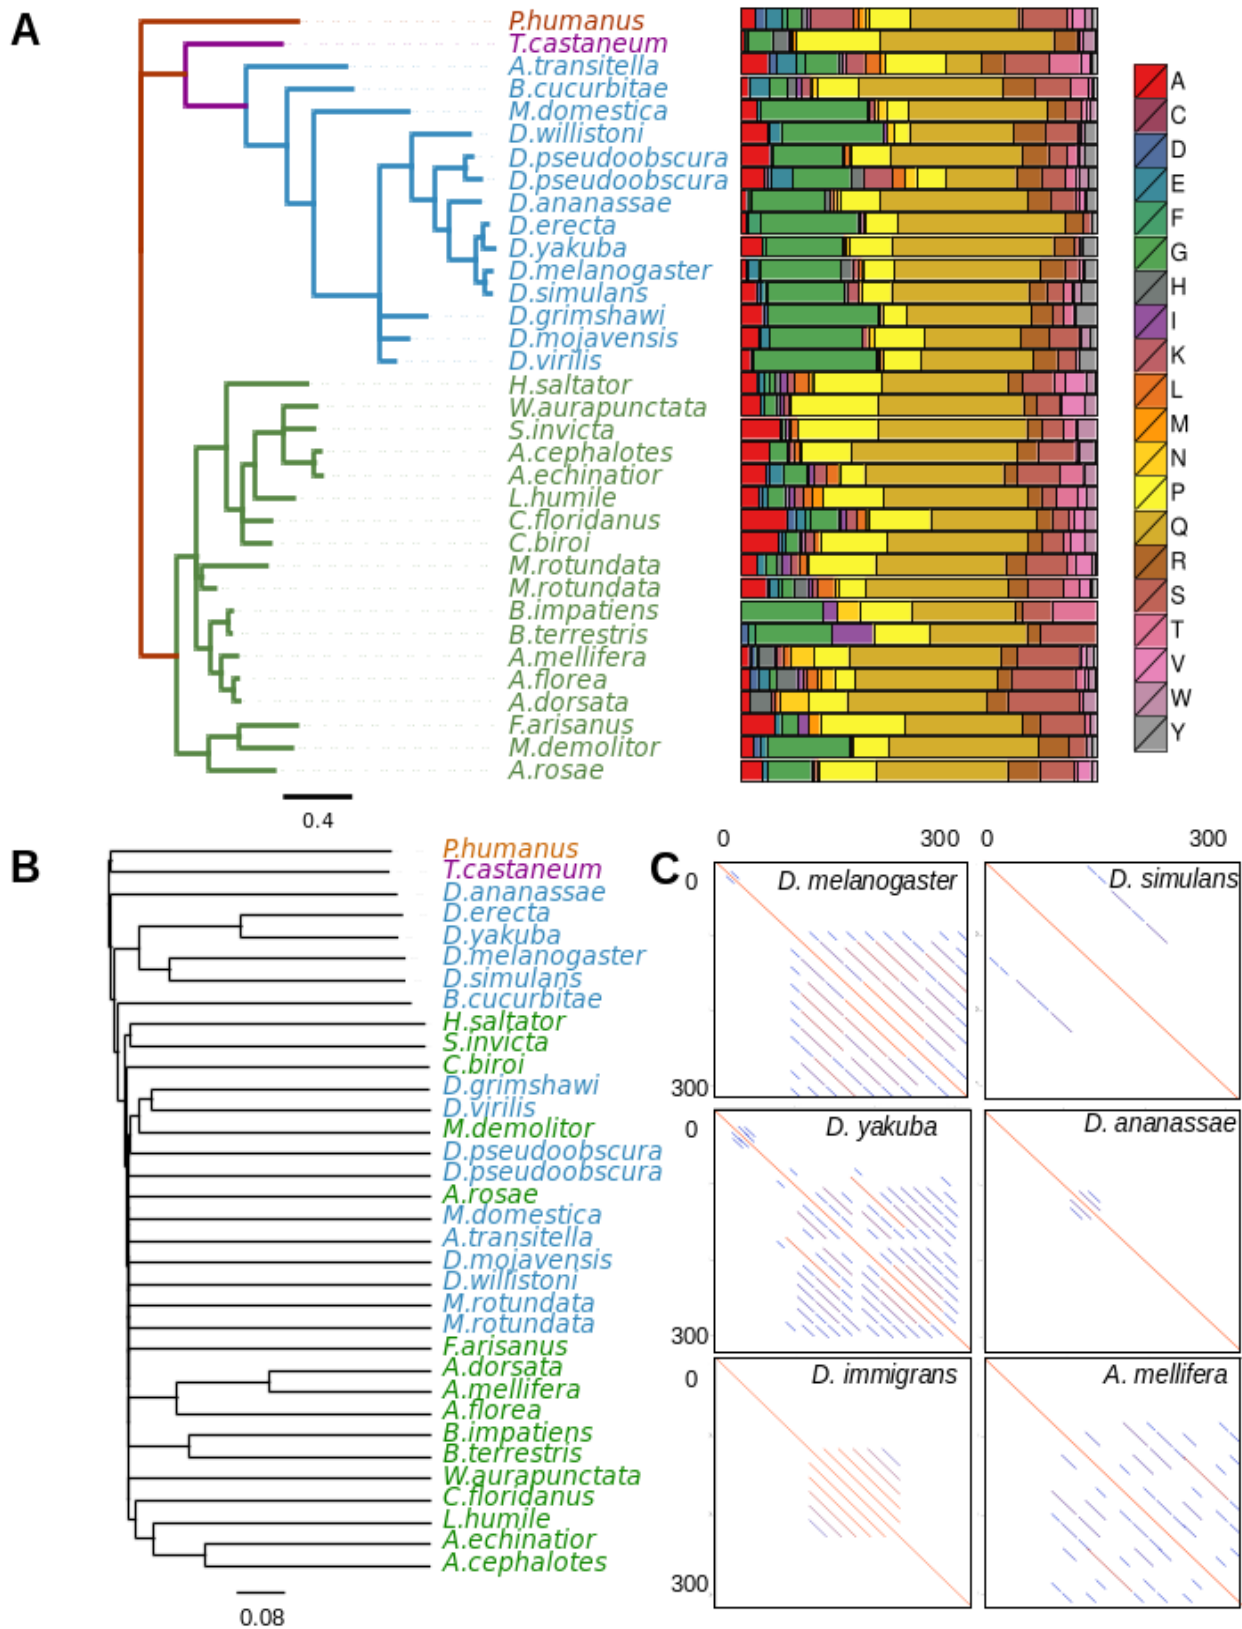

**Figure 1: GRR evolves rapidly but maintains similar sequence composition**

(A) The gene tree of conserved *Ago2* sequence C-terminal to the GRR, for selected insect species, along with the corresponding amino acid residue composition of the entire GRR for that species.

Hymenopteran species are coloured green and dipteran species are coloured blue. Across the insects analysed there is conservation of the residues from which the GRR is composed. (B) Neighbour joining tree drawn from FFP clusters derived from the protein sequence of the entire GRR region, the lack of internal resolution reflects the rapid divergence of the GRR among species. (C) The GRR structure can change rapidly among closely related species. Shown are dotplots for the N-terminal 300 amino acids of Ago2 (plotted against itself) in *D. melanogaster*, *D. simulans*, *D. yakuba*, *D. ananassae*, *D. immigrans*, and *A. mellifera*. In these dot plots the diagonal line from corner to corner represents the sequence identity to itself, and the successively shorter parallel lines reflect the multiple scales of self-similarity within the sequence.

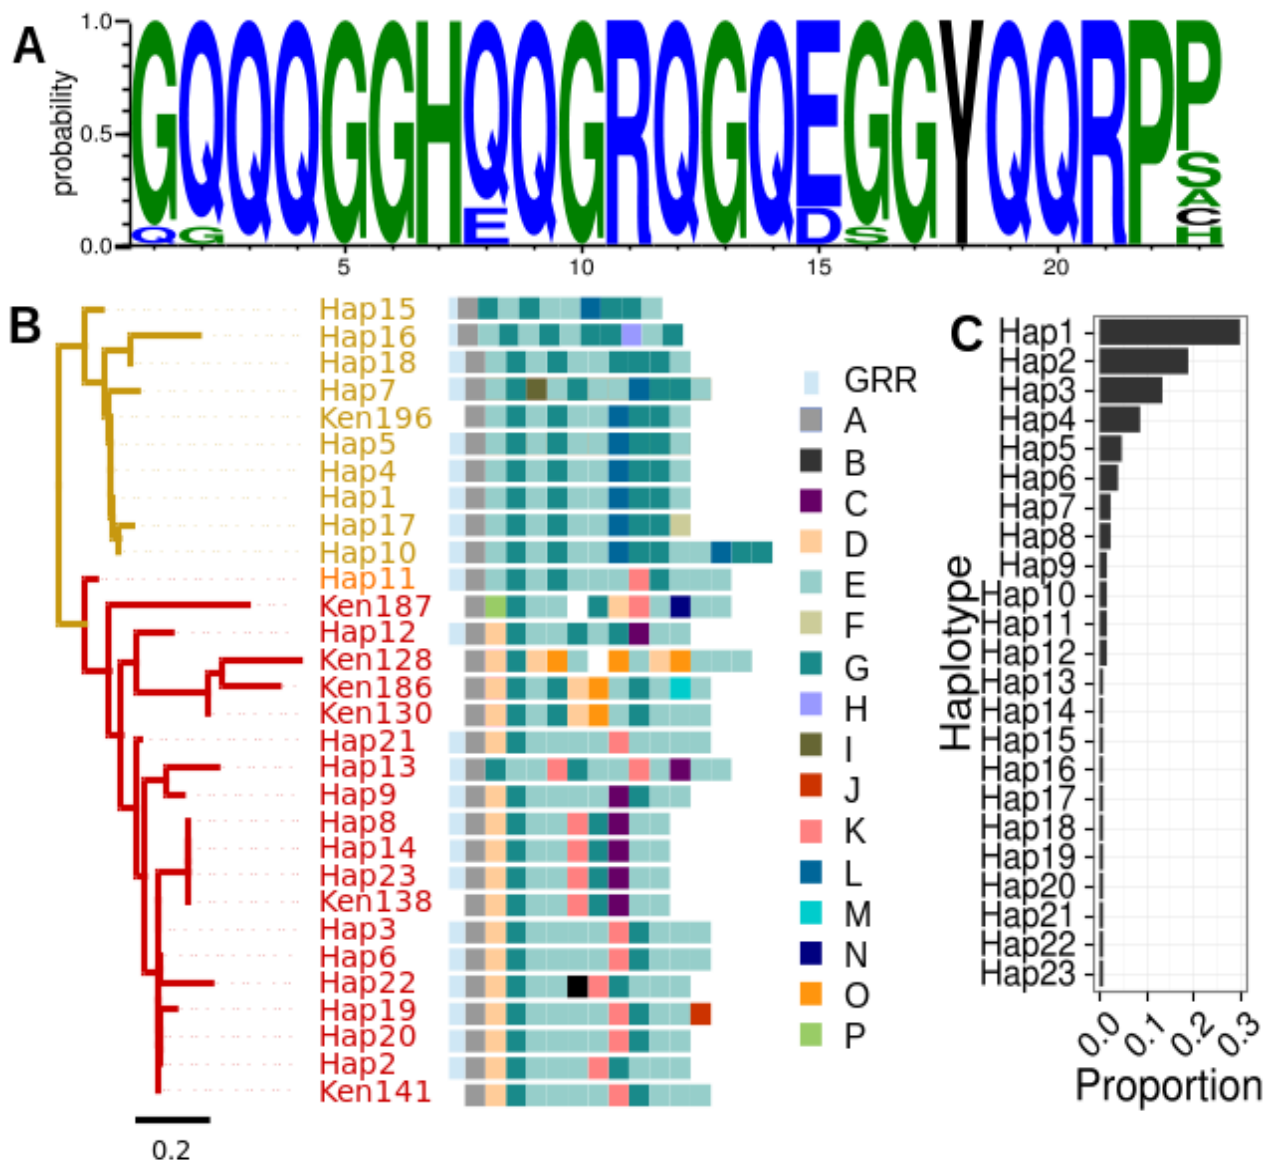

## Figure 2: Variation in the GRR repeat sequence and structure

(A) Presents a sequence logo built from the alignment of the DGRP repeat units. The height of the letter at each position signifies the frequency of that amino acid in the multiple sequence alignment, and the colour denotes hydrophobicity (blue: hydrophilic, blue: neutral, black: hydrophobic). (B) Similarity clustering analysis of GRR2 haplotypes reveals two large groups of *D. melanogaster* haplotypes (gold and red) and one putatively recombinant haplotype (orange). Haplotypes are illustrated using colour-codes for the 16 distinct repeat units corresponding to the arbitrary character identifiers A-P. In some Sanger-sequenced Kenyan haplotypes (labelled 'Ken') a repeat unit could not be determined, denoted by a white square. Note that repeat unit L is diagnostic of haplotype group 1, and units D and K are diagnostic of group 2. (C) Histogram of the frequency of each haplotype in the DGRP population. Most haplotypes occur at low frequency, with some high and intermediate frequency haplotypes.

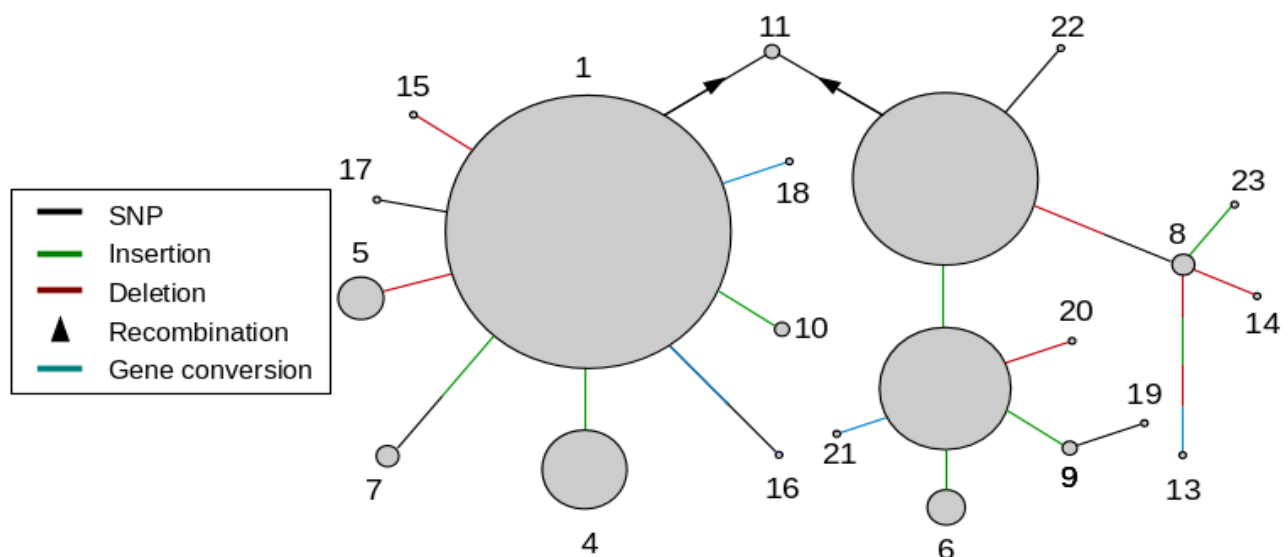



### Figure 3: Reconstructed recent history of the GRR

A network showing the inferred relationship between different GRR haplotypes (circles), with circle area corresponding to the frequency in our sample of the DGRP, and connectors representing different mutation or recombination events. Note that there are some haplotypes whose relationship is not easily linked with the others, for example, *GRR Hap13* is unlike any other haplotype sequence and there are large differences between *GRR Hap1* and *GRR Hap2*. In other cases it is not clear whether convergent mutation or recombination produced a particular haplotype - for example, the different GRR1 variants each occur in the background of multiple GRR2 variants (see Figure 2).

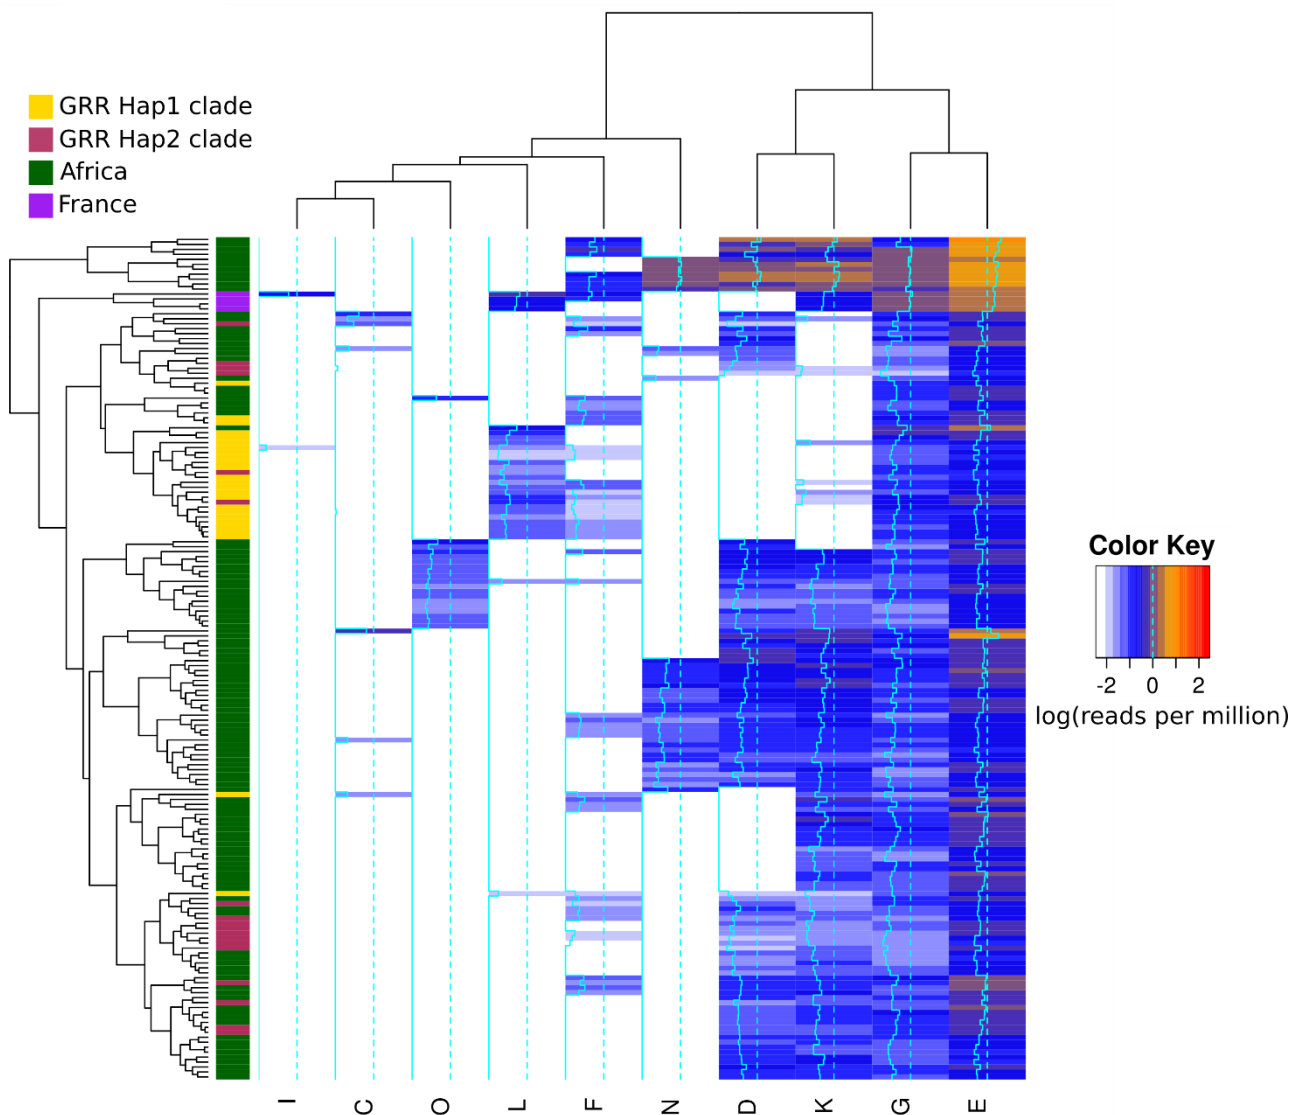

#### Figure 4: Repeat units in the *Drosophila* Nexus lines

Clustering of the distribution of repeat units in short read data for a sample in *Drosophila* populations taken from the nexus dataset (Lack et al, 2015). Lines were excluded if no short reads were found for ubiquitous repeat units (see materials and methods). *GRR Hap1* clade and *GRR Hap2* clade are those found in the clustering analysis of Figure 2. DGRP *GRR Hap1* clade appears to be derived from an ancestral African population, whereas *GRR Hap2* clade is more divergent, and represents a subset of African diversity. Also, notice the existence of population-specific repeat units (e.g. repeat units *O* and *N*) and population specific co-occurrence of repeats (e.g. repeat units *L* and *K* in France).

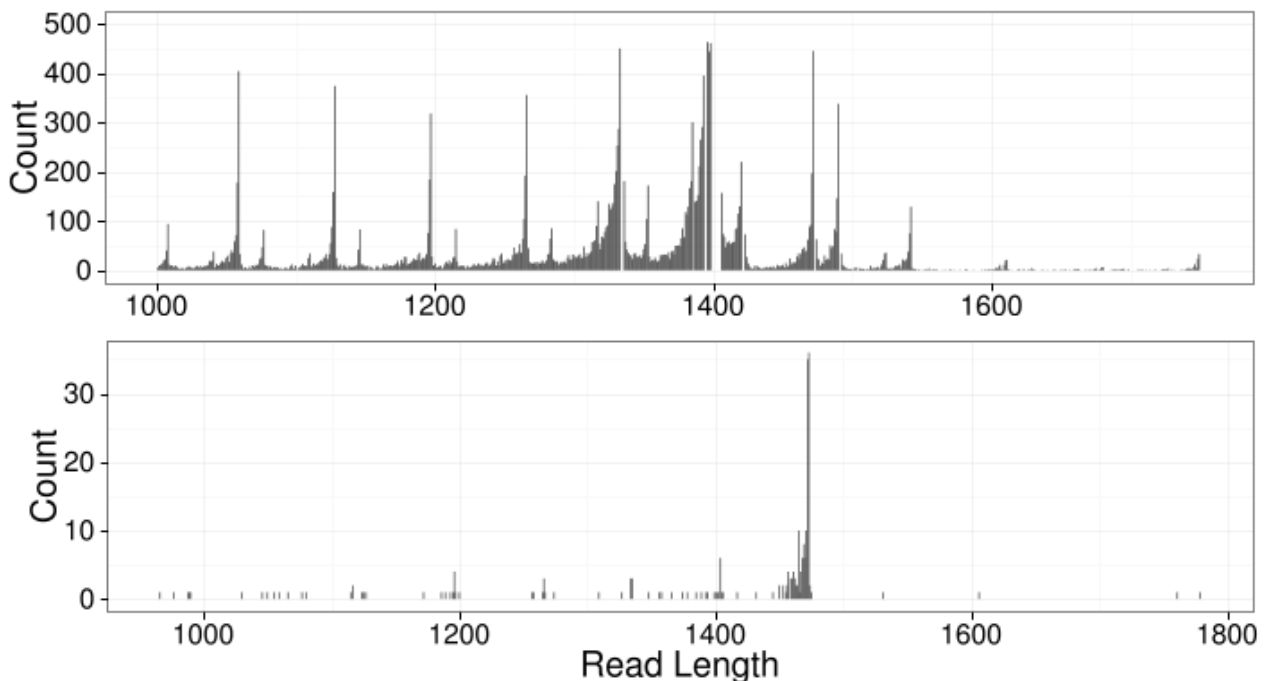

#### Figure S1: PacBio sequencing reads of the GRR

(Above) Read length distribution for all PacBio reads across GRR samples. Multiple peaks confirm that the population is variable in length for this region. (Below) An example line sequenced.

Consensus sequences were created from reads which had a length supported by more than 10 reads.

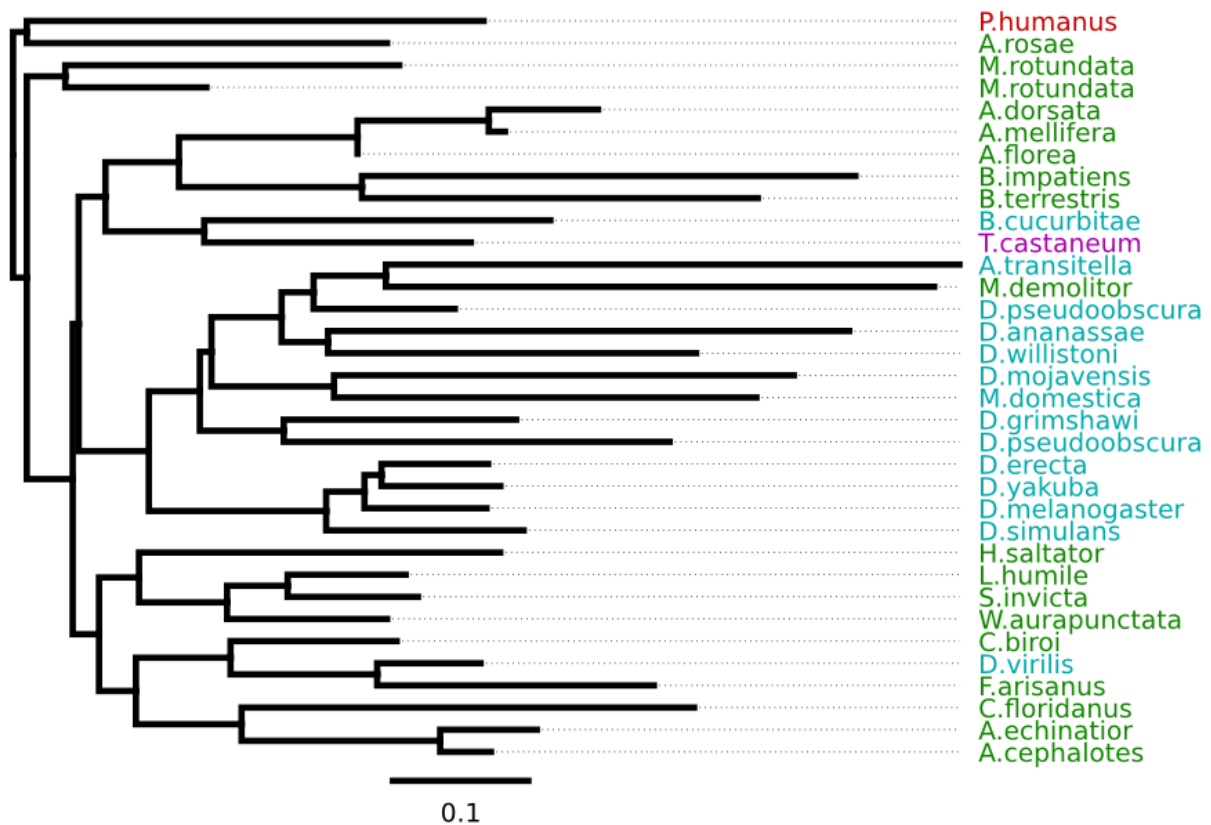

**Figure S2: FFP profile clustering from repeat unit consensus sequence**

The relationship between consensus sequences for GRR repeat units are unable to recover the true gene tree for *Ago2* (consistent with bottom of Figure 1). Using only repeat consensus sequences should remove the effect of structure (which repeats are next to each other) on this similarity clustering, but reduces the amount of data.

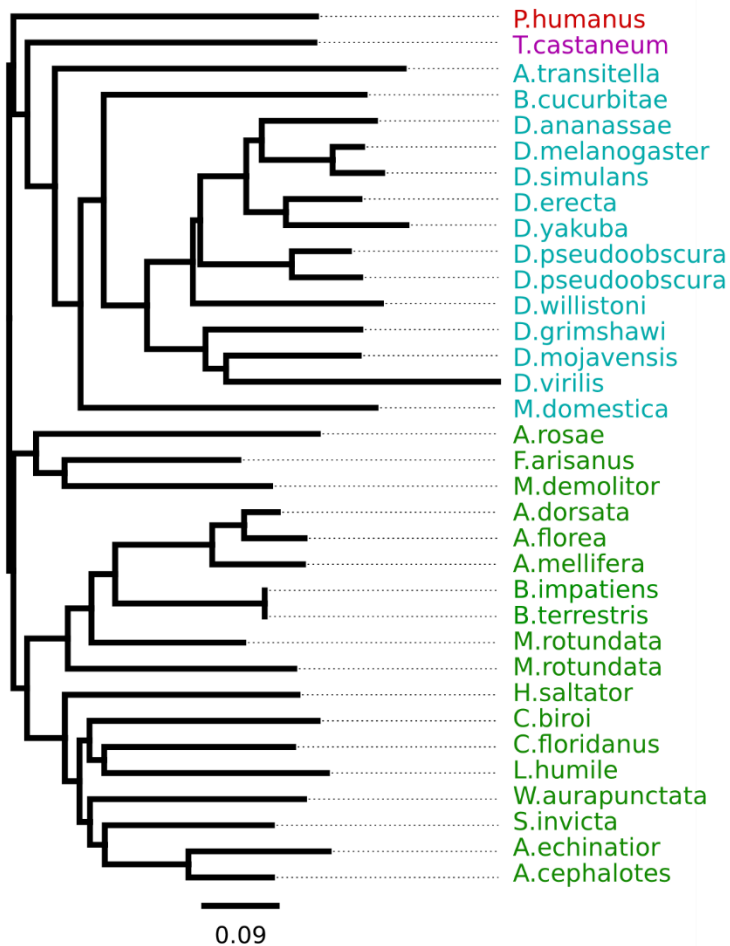

**Figure S3: FFP profile clustering from conserved Ago2 sequence**

FFP clustering on the conserved Ago2 sequence is mostly in accordance with the maximum clade credibility tree inferred using MrBayes (Figure 1, upper panel). This shows that the FFP clustering approach can infer an approximately correct gene tree from the remainder of Ago2, but not from the GRR region.

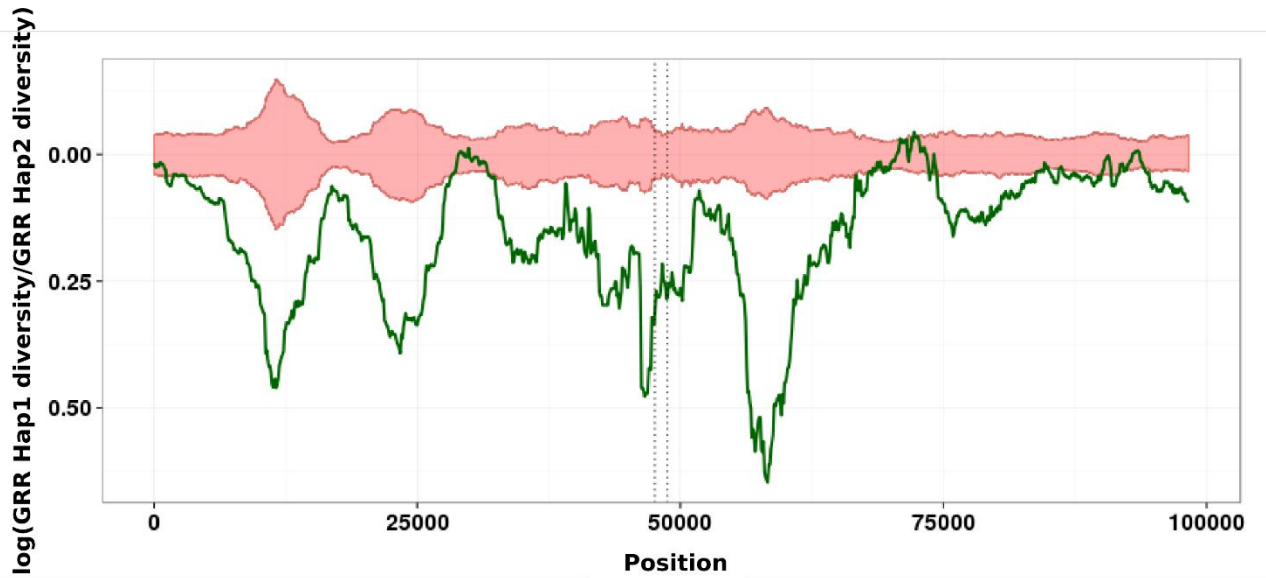

**Figure S4: Lower diversity in the GRR Hap1 group relative to GRR Hap2 group**

The log of the ratio of *GRR Hap1* clade to *GRR Hap2* clade diversity is plotted (green line) as a sliding window along the chromosome at 50 kb to either side of *Ago2*. The diversity in haplotypes which carry the *GRR Hap1* clade alleles show a surprising lack of diversity in a large area around *Ago2*. The red area shows the extremes of diversity differences expected by chance given the diversity in that region. The dotted lines show the gene region of *Ago2*.

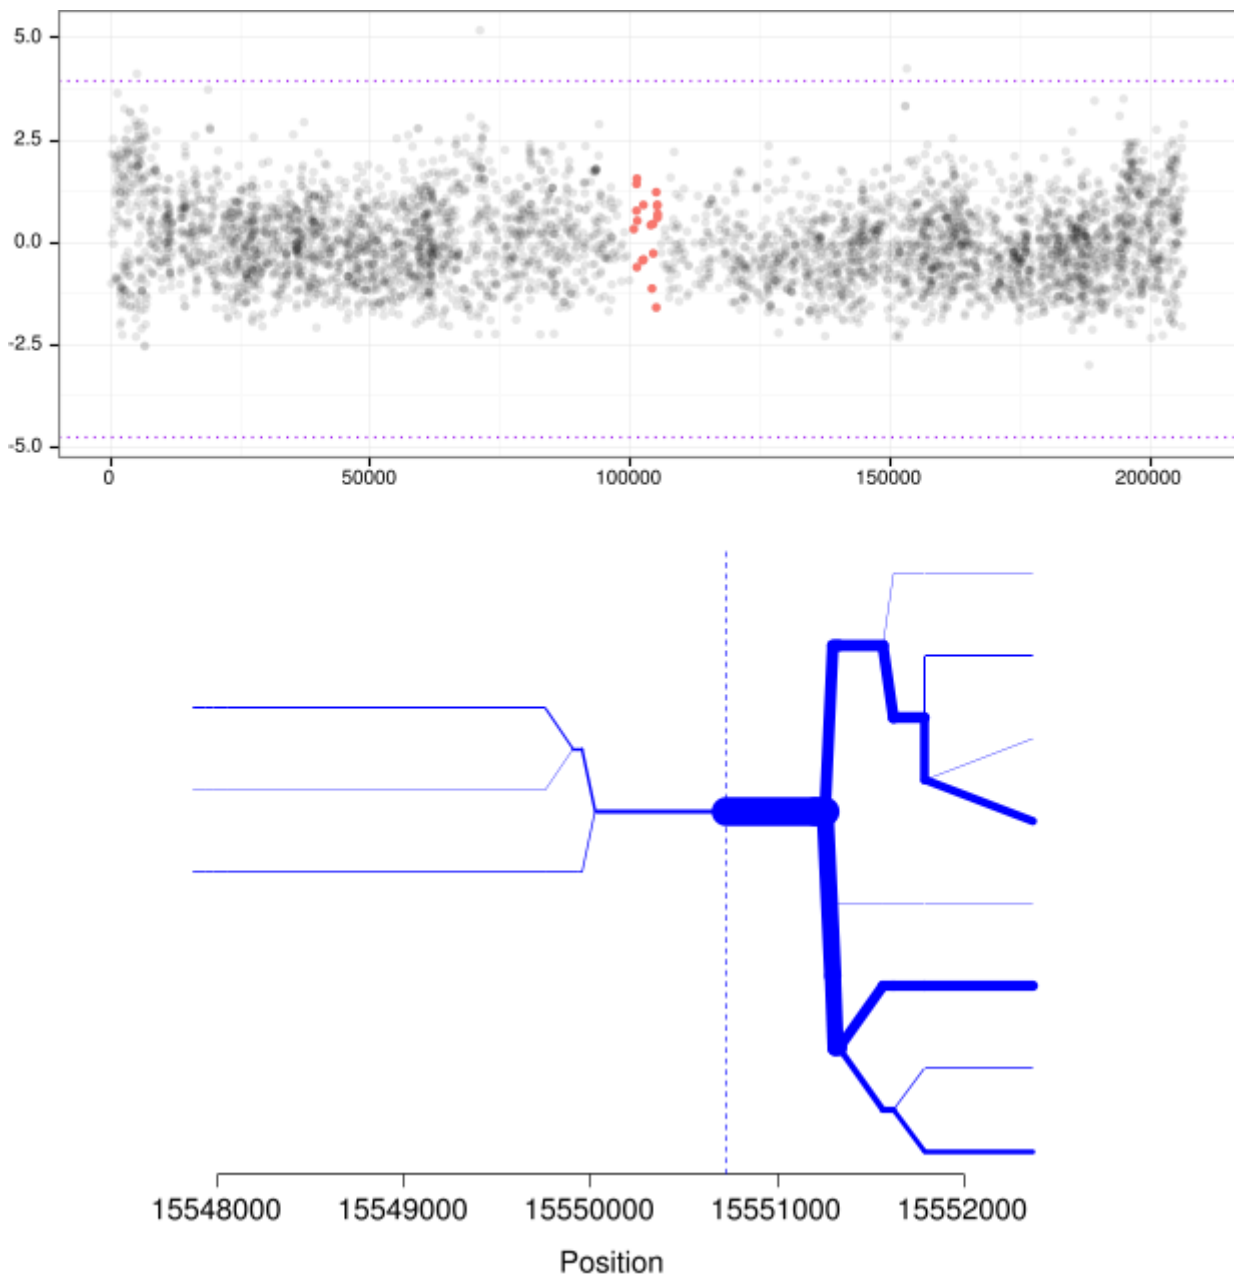

**Figure S5: AGO2 nSL signature in the DGRP and haplotype bifurcation diagram**

(Above) The frequency-standardised nSL statistic at each polymorphic site surrounding *Ago2* indicates no abnormal haplotype structure (red points show polymorphic sites within the *Ago2* gene, black points signify surrounding polymorphic sites). The dotted lines show a threshold at 3 interquartile ranges from the 1<sup>st</sup> and 3<sup>rd</sup> quartiles (i.e. extreme outliers). (Below) Visualising the breakdown of haplotype homozygosity supports this conclusion. The bifurcation diagram showing Extended Haplotype Homozygosity was created using the R package *rehh* (v.1.13, Gautier and Vitalis, 2012). Missing data for the intron upstream of the *GRR2* in the DGRP means there is

relatively few samples to calculate haplotype homozygosity for this region.

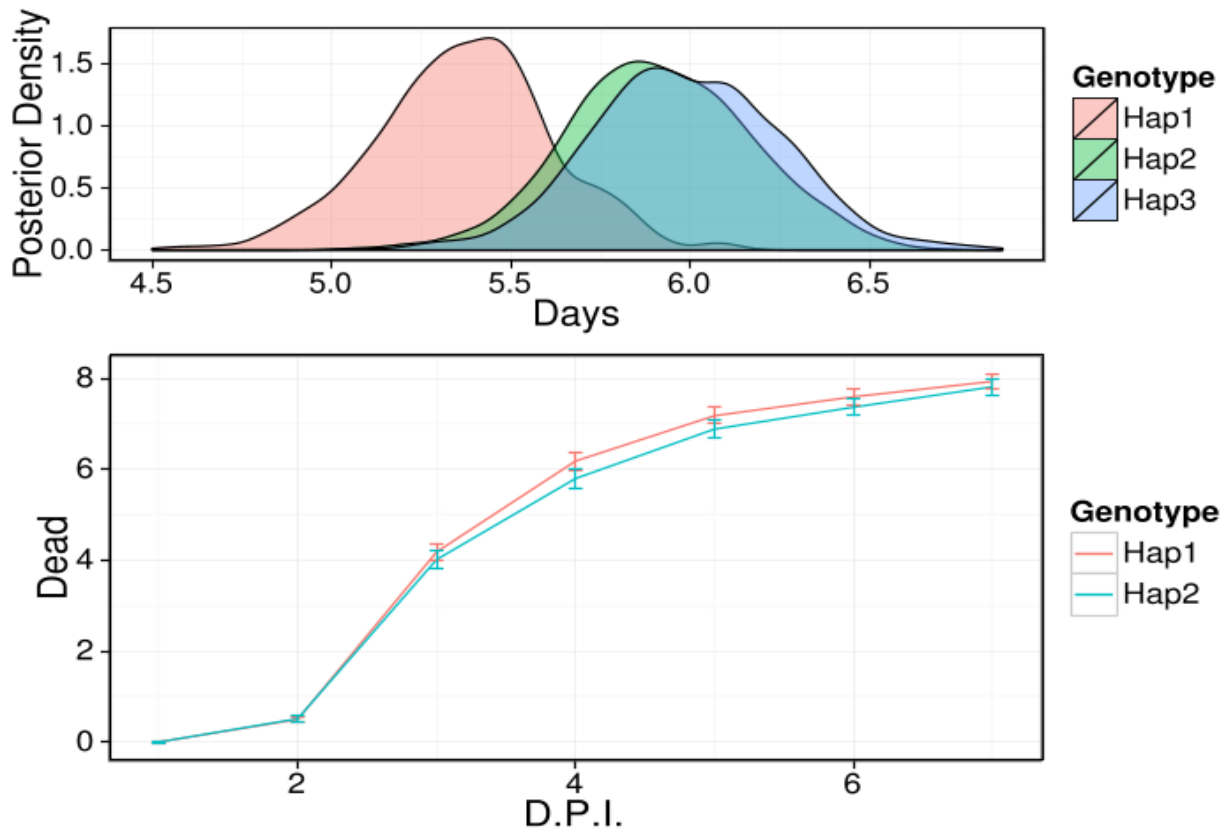

**Figure S6: Involvement of GRR during DCV infection**

(Upper) Estimated posterior density of the survival time (in days) post-infection for *GRR Hap1*, *GRR Hap2* and *GRR Hap3* using the GWAS data for the DGRP from Magwire et al (2012). *GRR Hap2* and *Hap3* are the two highest frequency haplotypes in the *GRR Hap2* clade (See Figure 2). (Below) However, upon infection with DCV, the two haplotype clades show no significant difference in mortality throughout infection in selected DSPR lines.

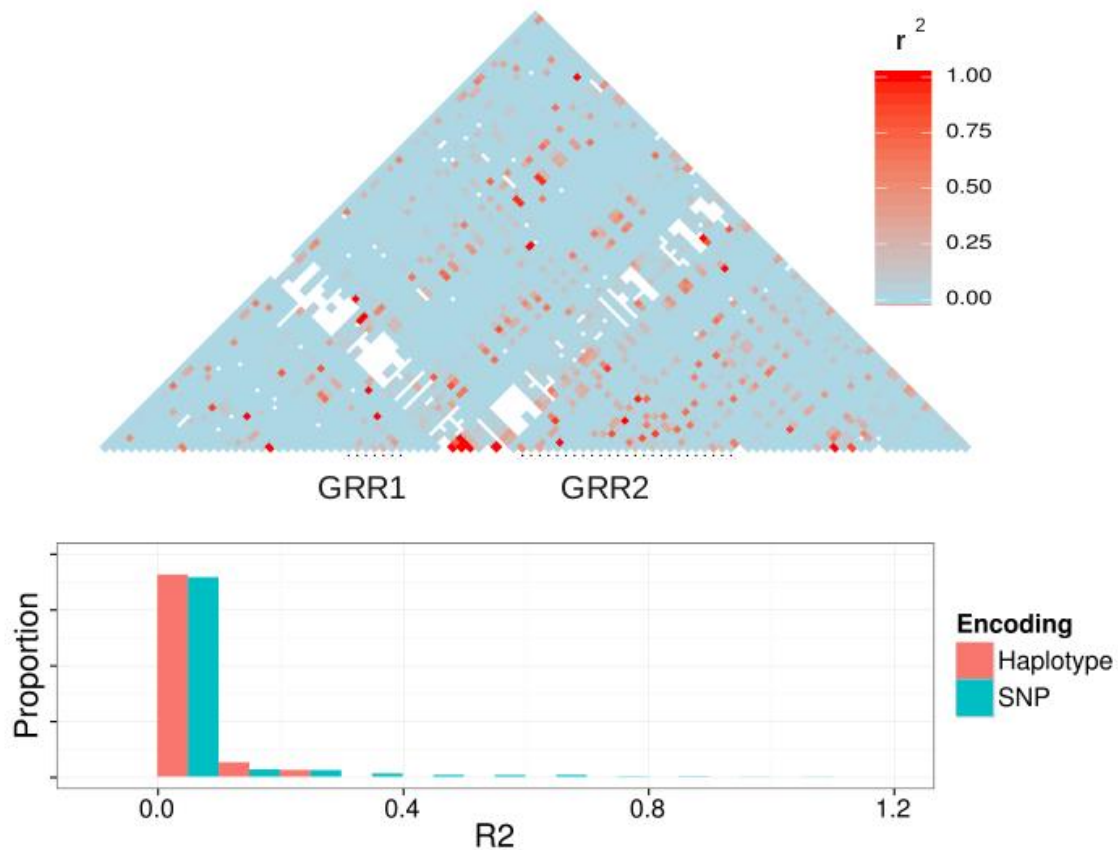

**Figure S7: Linkage between GRR and surrounding 10KB and  $r^2$  values between haplotypes and single GRR SNPs**

Pairwise linkage diagram between GRR and surrounding area (above) and a histogram summarising these values. GRR alleles were either broken into a series of SNPs or compared as a single haplotype to calculate  $r^2$ . Linkage is overall low between this region and flanking area, and most information is not recovered by linked SNPs when haplotypes are used to calculate  $r^2$ . As expected, when coding the GRR as one highly multiallelic locus, LD with surrounding areas was much lower, as  $r^2$  values for low frequency alleles is small and new haplotypes can be continually formed by both recombination and mutation.



## References

1. Antonovics J, Thrall PH. The Cost of Resistance and the Maintenance of Genetic Polymorphism in Host-Pathogen Systems. *Proc Biol Sci.* 1994;257(1349):105-110. <http://www.jstor.org/stable/50298>.
2. Benson G. Tandem repeats finder: a program to analyze DNA sequences. *Nucleic Acids Res.* 1999;27(2):573-580. [http://www.pubmedcentral.nih.gov/articlerender.fcgi?artid=148217&tool=pmcentrez&render\\_type=abstract](http://www.pubmedcentral.nih.gov/articlerender.fcgi?artid=148217&tool=pmcentrez&render_type=abstract). Accessed February 26, 2016.
3. Boland A, Tritschler F, Heimstädt S, Izaurralde E, Weichenrieder O. Crystal structure and ligand binding of the MID domain of a eukaryotic Argonaute protein. *EMBO Rep.* 2010;11(7):522-527. doi:10.1038/embor.2010.81.
4. Brun P, Plus N. The viruses of Drosophila. In: *The Genetics and Biology of Drosophila.* ; 1980:625-702.
5. Camacho C, Coulouris G, Avagyan V, et al. BLAST+: architecture and applications. *BMC Bioinformatics.* 2009;10(1):421. doi:10.1186/1471-2105-10-421.
6. Carmell MA, Xuan Z, Zhang MQ, Hannon GJ. The Argonaute family: tentacles that reach into RNAi, developmental control, stem cell maintenance, and tumorigenesis. *Genes Dev.* 2002;16(21):2733-2742. doi:10.1101/gad.1026102.
7. Edgar RC. MUSCLE: multiple sequence alignment with high accuracy and high throughput. *Nucleic Acids Res.* 2004;32(5):1792-1797. doi:10.1093/nar/gkh340.
8. Fan H-C, Ho L-I, Chi C-S, et al. Polyglutamine (PolyQ) Diseases: Genetics to Treatments. *Cell Transplant.* 2014;23(4):441-458. doi:10.3727/096368914X678454.
9. Ferrer-Admetlla A, Liang M, Korneliussen T, Nielsen R. On detecting incomplete soft or hard selective sweeps using haplotype structure. *Mol Biol Evol.* 2014;31(5):1275-1291. doi:10.1093/molbev/msu077.
10. Garnery L, Vautrin D, Cornuet JM, Solignac M. Phylogenetic relationships in the genus *Apis* inferred from mitochondrial DNA sequence data. *Apidologie.* 1991;22(1):87-92. doi:10.1051/apido:19910111.
11. Gautier M, Vitalis R. rehh: an R package to detect footprints of selection in genome-wide SNP data from haplotype structure. *Bioinformatics.* 2012;28(8):1176-1177. doi:10.1093/bioinformatics/bts115.
12. Gemayel R, Chavali S, Pougach K, et al. Variable Glutamine-Rich Repeats Modulate Transcription Factor Activity. *Mol Cell.* 2015;59(4):615-627. doi:10.1016/j.molcel.2015.07.003.
13. Gerber H, Seipel K, Georgiev O, et al. Transcriptional activation modulated by homopolymeric glutamine and proline stretches. *Science (80- ).* 1994;263(5148):808-811. doi:10.1126/science.8303297.

14. Hain D, Bettencourt BR, Okamura K, et al. Natural variation of the amino-terminal glutamine-rich domain in *Drosophila argonaute2* is not associated with developmental defects. *PLoS One*. 2010;5(12):e15264. doi:10.1371/journal.pone.0015264.
15. Hill WG, Robertson A. Linkage disequilibrium in finite populations. *Theor Appl Genet*. 1968;38(6):226-231. doi:10.1007/BF01245622.
16. Huelsenbeck JP, Ronquist F. MRBAYES: Bayesian inference of phylogenetic trees. *Bioinforma* . 2001;17 (8 ):754-755. doi:10.1093/bioinformatics/17.8.754.
17. Jorda J, Kajava A V. T-REKS: identification of Tandem REpeats in sequences with a K-meanS based algorithm. *Bioinformatics*. 2009;25(20):2632-2638. doi:10.1093/bioinformatics/btp482.
18. King EG, Macdonald SJ, Long AD. Properties and power of the *Drosophila* Synthetic Population Resource for the routine dissection of complex traits. *Genetics*. 2012;191(3):935-949. doi:10.1534/genetics.112.138537.
19. Kolaczkowski B, Hupalo DN, Kern AD. Recurrent adaptation in RNA interference genes across the *drosophila* phylogeny. *Mol Biol Evol*. 2011;28(2):1033-1042. doi:10.1093/molbev/msq284.
20. Kwak PB, Tomari Y. The N domain of Argonaute drives duplex unwinding during RISC assembly. *Nat Struct Mol Biol*. 2012;19(2):145-151. doi:10.1038/nsmb.2232.
21. Lachaise D, Silvain J-F. How two Afrotropical endemics made two cosmopolitan human commensals: the *Drosophila melanogaster*-*D. simulans* palaeogeographic riddle. *Genetica*. 2004;120(1-3):17-39. <http://www.ncbi.nlm.nih.gov/pubmed/15088644>. Accessed April 7, 2016.
22. Lack JB, Cardeno CM, Crepeau MW, et al. The *Drosophila* genome nexus: a population genomic resource of 623 *Drosophila melanogaster* genomes, including 197 from a single ancestral range population. *Genetics*. 2015;199(4):1229-1241. doi:10.1534/genetics.115.174664.
23. Langmead B, Salzberg SL. Fast gapped-read alignment with Bowtie 2. *Nat Methods*. 2012;9(4):357-359. doi:10.1038/nmeth.1923.
24. Lee YS, Nakahara K, Pham JW, et al. Distinct roles for *Drosophila* Dicer-1 and Dicer-2 in the siRNA/miRNA silencing pathways. *Cell*. 2004;117(1):69-81. doi:10.1016/S0092-8674(04)00261-2.
25. Lindbo JA, Silva-Rosales L, Proebsting WM, Dougherty WG. Induction of a Highly Specific Antiviral State in Transgenic Plants: Implications for Regulation of Gene Expression and Virus Resistance. *Plant Cell*. 1993;5(12):1749-1759. doi:10.1105/tpc.5.12.1749.
26. Lingel A, Simon B, Izaurralde E, Sattler M. Structure and nucleic-acid binding of the *Drosophila* Argonaute 2 PAZ domain. *Nature*. 2003;426(6965):465-469. doi:10.1038/nature02123.
27. Liu Y, Ye X, Jiang F, et al. C3PO, an endoribonuclease that promotes RNAi by facilitating RISC activation. *Science*. 2009;325(5941):750-753. doi:10.1126/science.1176325.

28. Longdon B, Hadfield JD, Webster CL, Obbard DJ, Jiggins FM. Host phylogeny determines viral persistence and replication in novel hosts. *PLoS Pathog.* 2011;7(9). doi:10.1371/journal.ppat.1002260.
29. Longdon B, Wilfert L, Jiggins FM. The sigma viruses of *Drosophila*. *Rhabdoviruses Mol Taxon Evol Genomics, Ecol Cytopathol Control.* 2012:117-132.
30. Ma J-B, Ye K, Patel DJ. Structural basis for overhang-specific small interfering RNA recognition by the PAZ domain. *Nature.* 2004;429(6989):318-322. doi:10.1038/nature02519.
31. Ma J-B, Yuan Y-R, Meister G, Pei Y, Tuschl T, Patel DJ. Structural basis for 5'-end-specific recognition of guide RNA by the A. fulgidus Piwi protein. *Nature.* 2005;434(7033):666-670. doi:10.1038/nature03514.
32. Mackay TFC, Richards S, Stone EA, et al. The *Drosophila melanogaster* Genetic Reference Panel. *Nature.* 2012;482(7384):173-178. doi:10.1038/nature10811.
33. Magwire MM, Bayer F, Webster CL, Cao C, Jiggins FM. Successive increases in the resistance of *Drosophila* to viral infection through a transposon insertion followed by a duplication. *PLoS Genet.* 2011;7(10). doi:10.1371/journal.pgen.1002337.
34. Magwire MM, Fabian DK, Schweyen H, et al. Genome-wide association studies reveal a simple genetic basis of resistance to naturally coevolving viruses in *Drosophila melanogaster*. *PLoS Genet.* 2012;8(11):e1003057. doi:10.1371/journal.pgen.1003057.
35. Maillard P V, Ciaudo C, Marchais A, et al. Antiviral RNA interference in mammalian cells. *Science.* 2013;342(6155):235-238. doi:10.1126/science.1241930.
36. Marçais G, Kingsford C. A fast, lock-free approach for efficient parallel counting of occurrences of k-mers. *Bioinformatics.* 2011;27(6):764-770. doi:10.1093/bioinformatics/btr011.
37. Meister G. Argonaute proteins: functional insights and emerging roles. *Nat Rev Genet.* 2013;14(7):447-459. doi:10.1038/nrg3462.
38. Obbard DJ, Jiggins FM, Bradshaw NJ, Little TJ. Recent and recurrent selective sweeps of the antiviral RNAi gene argonaute-2 in three species of *Drosophila*. *Mol Biol Evol.* 2011;28(2):1043-1056. doi:10.1093/molbev/msq280.
39. Obbard DJ, Jiggins FM, Halligan DL, Little TJ. Natural selection drives extremely rapid evolution in antiviral RNAi genes. *Curr Biol.* 2006;16(6):580-585. doi:10.1016/j.cub.2006.01.065.
40. Obbard DJ, Welch JJ, Kim KW, Jiggins FM. Quantifying adaptive evolution in the *Drosophila* immune system. *PLoS Genet.* 2009;5(10). doi:10.1371/journal.pgen.1000698.
41. Obbard DJ, Gordon KHJ, Buck AH, Jiggins FM. The evolution of RNAi as a defence against viruses and transposable elements. *Philos Trans R Soc Lond B Biol Sci.* 2009;364(1513):99-115. doi:10.1098/rstb.2008.0168.

42. Okamura K, Ishizuka A, Siomi H, Siomi MC. Distinct roles for Argonaute proteins in small RNA-directed RNA cleavage pathways. *Genes Dev.* 2004;18(14):1655-1666. doi:10.1101/gad.1210204.
43. Parker JS, Roe SM, Barford D. Crystal structure of a PIWI protein suggests mechanisms for siRNA recognition and slicer activity. *EMBO J.* 2004;23(24):4727-4737. doi:10.1038/sj.emboj.7600488.
44. Ratcliff F, Harrison BD, Baulcombe BC. A Similarity Between Viral Defense and Gene Silencing in Plants. *Science (80- )*. 1997;276(5318):1558-1560. doi:10.1126/science.276.5318.1558.
45. Rice C, Beekman D, Liu L, Erives A. The Nature, Extent, and Consequences of Genetic Variation in the opa Repeats of Notch in *Drosophila*. *G3 (Bethesda)*. 2015;5(11):2405-2419. doi:10.1534/g3.115.021659.
46. Sabeti PC, Reich DE, Higgins JM, et al. Detecting recent positive selection in the human genome from haplotype structure. *Nature*. 2002;419(6909):832-837. doi:10.1038/nature01140.
47. Salichs E, Ledda A, Mularoni L, Albà MM, de la Luna S. Genome-wide analysis of histidine repeats reveals their role in the localization of human proteins to the nuclear speckles compartment. *PLoS Genet.* 2009;5(3):e1000397. doi:10.1371/journal.pgen.1000397.
48. Sasaki A. Host-parasite coevolution in a multilocus gene-for-gene system. *Proc Biol Sci.* 2000;267(1458):2183-2188. doi:10.1098/rspb.2000.1267.
49. Sawaya S, Jones M, Keller M. Linkage disequilibrium between single nucleotide polymorphisms and hypermutable loci. *Genetics*. 2016.
50. Schrider DR, Mendes FK, Hahn MW, Kern AD. Soft shoulders ahead: spurious signatures of soft and partial selective sweeps result from linked hard sweeps. *Genetics*. 2015;200(1):267-284. doi:10.1534/genetics.115.174912.
51. Segers GC, van Wezel R, Zhang X, Hong Y, Nuss DL. Hypovirus papain-like protease p29 suppresses RNA silencing in the natural fungal host and in a heterologous plant system. *Eukaryot Cell.* 2006;5(6):896-904. doi:10.1128/EC.00373-05.
52. Sims GE, Jun S-R, Wu GA, Kim S-H. Alignment-free genome comparison with feature frequency profiles (FFP) and optimal resolutions. *Proc Natl Acad Sci.* 2009;106(8):2677-2682. doi:10.1073/pnas.0813249106.
53. Song J-J, Smith SK, Hannon GJ, Joshua-Tor L. Crystal structure of Argonaute and its implications for RISC slicer activity. *Science*. 2004;305(5689):1434-1437. doi:10.1126/science.1102514.
54. Stephan W, Li H. The recent demographic and adaptive history of *Drosophila melanogaster*. *Heredity (Edinb)*. 2007;98(2):65-68. doi:10.1038/sj.hdy.6800901.
55. Swarts DC, Makarova K, Wang Y, et al. The evolutionary journey of Argonaute proteins. *Nat Struct Mol Biol.* 2014;21(9):743-753. doi:10.1038/nsmb.2879.

56. Treangen TJ, Salzberg SL. Repetitive DNA and next-generation sequencing: computational challenges and solutions. *Nat Rev Genet.* 2012;13(1):36-46. doi:10.1038/nrg3117.
57. van Mierlo JT, Overheul GJ, Obadia B, et al. Novel Drosophila Viruses Encode Host-Specific Suppressors of RNAi. Schneider DS, ed. *PLoS Pathog.* 2014;10(7):e1004256. doi:10.1371/journal.ppat.1004256.
58. Voight BF, Kudaravalli S, Wen X, Pritchard JK. A map of recent positive selection in the human genome. *PLoS Biol.* 2006;4(3):e72. doi:10.1371/journal.pbio.0040072.
59. Wang X-H, Aliyari R, Li W-X, et al. RNA interference directs innate immunity against viruses in adult Drosophila. *Science.* 2006;312(5772):452-454. doi:10.1126/science.1125694.
60. Webster CL, Longdon B, Lewis SH, Obbard D. *Twenty Five New Viruses Associated with the Drosophilidae (Diptera)*. Cold Spring Harbor Labs Journals; 2016. doi:10.1101/041665.
61. Webster CL, Waldron FM, Robertson S, et al. The Discovery, Distribution, and Evolution of Viruses Associated with *Drosophila melanogaster*. *PLoS Biol.* 2015;13(7):e1002210. doi:10.1371/journal.pbio.1002210.
62. Wilkins C, Dishongh R, Moore SC, Whitt MA, Chow M, Machaca K. RNA interference is an antiviral defence mechanism in *Caenorhabditis elegans*. *Nature.* 2005;436(7053):1044-1047. doi:10.1038/nature03957.
63. Zerbino DR, Birney E. Velvet: algorithms for de novo short read assembly using de Bruijn graphs. *Genome Res.* 2008;18(5):821-829. doi:10.1101/gr.074492.107.
64. Zhao HH, Fernando RL, Dekkers JCM. Power and precision of alternate methods for linkage disequilibrium mapping of quantitative trait loci. *Genetics.* 2007;175(4):1975-1986. doi:10.1534/genetics.106.066480.
